# Supplementary material
Source: Springer Nature journal article supplement (https://www.springermedizin.de/resource/supplementary/13014_2011_587_MOESM2_ESM.pdf/9634158)
Supplement: MOESM2 [file 9634158]

Additional file 2-Cycle threshold (CT) values range and coefficient of variation (CV) of 32 HKGs in each cell line

| A431           |          |      | A549           |          |       | BxPC3          |          |      |
|----------------|----------|------|----------------|----------|-------|----------------|----------|------|
| Genes          | CT range | CV   | Genes          | CT range | CV    | Genes          | CT range | CV   |
| <i>GUSB</i>    | 0.64     | 1.23 | <i>PES1</i>    | 0.41     | 0.83  | <i>TBP</i>     | 0.12     | 0.25 |
| <i>CDKN1A</i>  | 0.70     | 1.29 | <i>CASC3</i>   | 0.81     | 1.52  | <i>HPRT1</i>   | 0.03     | 0.35 |
| <i>PSMC4</i>   | 0.71     | 1.39 | <i>RPL37A</i>  | 0.77     | 1.84  | <i>CASC3</i>   | 0.19     | 0.37 |
| <i>CASC3</i>   | 0.71     | 1.40 | <i>ACTB</i>    | 0.82     | 2.11  | <i>RPLP0</i>   | 0.15     | 0.39 |
| <i>POLR2A</i>  | 0.75     | 1.41 | <i>HMBS</i>    | 1.25     | 2.32  | <i>PUM1</i>    | 0.22     | 0.40 |
| <i>ABL</i>     | 0.87     | 1.66 | <i>UBC</i>     | 1.08     | 2.51  | <i>MRPL19</i>  | 0.25     | 0.48 |
| <i>RPL37A</i>  | 0.75     | 1.72 | <i>RPLP0</i>   | 0.97     | 2.6   | <i>RPL37A</i>  | 0.21     | 0.49 |
| <i>PGK1</i>    | 0.78     | 1.74 | <i>GAPDH</i>   | 1.00     | 2.67  | <i>GUSB</i>    | 0.29     | 0.55 |
| <i>TBP</i>     | 0.99     | 1.75 | <i>MT-ATP6</i> | 1.01     | 2.82  | <i>EIF2B1</i>  | 0.40     | 0.55 |
| <i>UBC</i>     | 0.75     | 1.76 | <i>GUSB</i>    | 1.49     | 2.85  | <i>POP4</i>    | 0.34     | 0.63 |
| <i>PPIA</i>    | 0.77     | 1.79 | <i>TBP</i>     | 1.70     | 3.07  | <i>PSMC4</i>   | 0.35     | 0.66 |
| <i>RPLP0</i>   | 0.71     | 1.84 | <i>RPS17</i>   | 1.25     | 3.09  | <i>ABL</i>     | 0.38     | 0.67 |
| <i>EIF2B1</i>  | 1.05     | 1.86 | <i>PSMC4</i>   | 1.56     | 3.34  | <i>UBC</i>     | 0.35     | 0.75 |
| <i>HMBS</i>    | 0.16     | 1.89 | <i>ABL</i>     | 1.92     | 3.59  | <i>YWHAZ</i>   | 0.46     | 0.78 |
| <i>HPRT1</i>   | 0.99     | 1.91 | <i>PGK1</i>    | 1.73     | 3.75  | <i>B2M</i>     | 0.33     | 0.80 |
| <i>PES1</i>    | 0.89     | 1.99 | <i>POLR2A</i>  | 1.99     | 3.75  | <i>RPL30</i>   | 0.31     | 0.81 |
| <i>PUM1</i>    | 1.12     | 2.06 | <i>RPL30</i>   | 1.74     | 4.08  | <i>CDKN1A</i>  | 1.18     | 0.82 |
| <i>MT-ATP6</i> | 0.76     | 2.14 | <i>PUM1</i>    | 2.23     | 4.08  | <i>ELF1</i>    | 0.40     | 0.90 |
| <i>GAPDH</i>   | 0.84     | 2.16 | <i>PPIA</i>    | 1.64     | 4.18  | <i>RPS17</i>   | 0.37     | 0.97 |
| <i>ELF1</i>    | 1.13     | 2.22 | <i>GADD45A</i> | 2.87     | 4.32  | <i>PGK1</i>    | 0.41     | 0.99 |
| <i>MRPL19</i>  | 1.20     | 2.25 | <i>EIF2B1</i>  | 2.87     | 4.58  | <i>ACTB</i>    | 0.43     | 1.04 |
| <i>RPL30</i>   | 0.93     | 2.28 | <i>HPRT1</i>   | 2.53     | 4.70  | <i>HMBS</i>    | 0.61     | 1.09 |
| <i>POP4</i>    | 1.14     | 2.28 | <i>CDKN1B</i>  | 2.41     | 4.87  | <i>PPIA</i>    | 0.41     | 1.10 |
| <i>CDKN1B</i>  | 1.36     | 2.4  | <i>MRPL19</i>  | 2.57     | 5.02  | <i>IPO8</i>    | 0.59     | 1.10 |
| <i>YWHAZ</i>   | 1.27     | 2.45 | <i>POP4</i>    | 2.68     | 5.29  | <i>TFRC</i>    | 0.55     | 1.19 |
| <i>GADD45A</i> | 1.39     | 2.62 | <i>ELF1</i>    | 2.87     | 5.35  | <i>POLR2A</i>  | 0.80     | 1.46 |
| <i>IPO8</i>    | 1.61     | 2.95 | <i>YWHAZ</i>   | 3.25     | 5.58  | <i>PES1</i>    | 0.70     | 1.53 |
| <i>RPS17</i>   | 1.31     | 2.99 | <i>CDKN1A</i>  | 2.59     | 5.77  | <i>GADD45A</i> | 0.40     | 1.67 |
| <i>TFRC</i>    | 1.72     | 3.71 | <i>B2M</i>     | 3.08     | 6.49  | <i>MT-ATP6</i> | 0.59     | 1.71 |
| <i>ACTB</i>    | 1.52     | 3.75 | <i>IPO8</i>    | 1.99     | 7.71  | <i>GAPDH</i>   | 0.65     | 1.85 |
| <i>B2M</i>     | 1.89     | 4.13 | <i>TFRC</i>    | 4.22     | 7.91  | <i>CDKN1B</i>  | 0.25     | 2.10 |
| <i>18S</i>     | 2.12     | 9.24 | <i>18S</i>     | 2.68     | 12.47 | <i>18S</i>     | 0.82     | 3.79 |
